# Supplementary material for: Enrichment and aggregation of topological motifs are independent organizational principles of integrated interaction networks
Source: Royal Society of Chemistry journal article supplement (doi:10.1039/c1mb05241a), 2011-08-23
Supplement: c1mb05241a.pdf [file c1mb05241a.pdf]

**Enrichment and aggregation of topological motifs are independent organizational principles of integrated interaction networks:  
Supplementary Tables**

Tom Michoel,<sup>1,\*</sup> Anagha Joshi,<sup>2</sup> Bruno Nachtergaele,<sup>3</sup> and Yves Van de Peer<sup>4,5</sup>  
<sup>1</sup>Freiburg Institute for Advanced Studies (FRIAS), University of Freiburg, Albertstrasse 19, 79104 Freiburg, Germany.  
<sup>2</sup>Department of Haematology, Cambridge Institute for Medical Research, University of Cambridge, Wellcome Trust/MRC Building Hills Rd, Cambridge CB2 0XY, United Kingdom.  
<sup>3</sup>Department of Mathematics, University of California, Davis, One Shields Avenue, Davis, CA 95616-8366, USA  
<sup>4</sup>Department of Plant Systems Biology, VIB, Technologiepark 927, B-9052 Gent, Belgium  
<sup>5</sup>Department of Plant Biotechnology and Genetics, Ghent University, Technologiepark 927, B-9052 Gent, Belgium  
  
(Dated: June 16, 2011)

**I. FUNCTIONAL CATEGORIES ENRICHED IN TRANSCRIPTIONAL FEEDFORWARD LOOP CLUSTERS**

| MIPS functional category                                     | Enriched clusters                |
|--------------------------------------------------------------|----------------------------------|
| Regulation of amino acid metabolism                          | 31, 66                           |
| Regulation of nitrogen, sulfur and selenium metabolism       | 31                               |
| C-compound and carbohydrate metabolism                       | 2, 25, 41                        |
| Phospholipid metabolism                                      | 43                               |
| Regulation of lipid, fatty acid and isoprenoid metabolism    | 31, 55                           |
| Metabolism of energy reserves (e.g. glycogen, trehalose)     | 4                                |
| Cytokinesis (cell division) /septum formation and hydrolysis | 20                               |
| General transcription activities                             | 6, 37, 43, 45, 66                |
| Transcriptional control                                      | 1, 6, 38, 47, 50, 56, 73, 78, 79 |
| Transcription activation                                     | 31                               |
| Ribosomal proteins                                           | 54                               |
| Protein binding                                              | 79                               |
| DNA binding                                                  | 16, 31, 55, 64                   |
| Sugar transport                                              | 2, 6, 10                         |
| Cellular import                                              | 2                                |
| Stress response                                              | 51                               |
| Pheromone response                                           | 51, 79                           |
| Mating (fertilization)                                       | 1                                |

TABLE S1 MIPS functional categories enriched with hypergeometric  $P < 10^{-3}$  in clusters containing at least four transcriptional regulatory feedforward loop instances and with at least three proteins annotated to the enriched category.

\*Corresponding author, E-mail: tom.michoel@frias.uni-freiburg.de

II. TRANSCRIPTIONAL REGULONIC PROTEIN COMPLEXES

| Cluster ID | Regulator      | # Nodes | Int. density | Protein complex              | P-value             |
|------------|----------------|---------|--------------|------------------------------|---------------------|
| 1          | RAP1,FHL1      | 27      | 0.79         | Ribosomal large subunit      | $8 \times 10^{-12}$ |
|            |                |         |              | Ribosomal small subunit      | $2 \times 10^{-11}$ |
| 2          | YAP5,GAT3      | 10      | 0.8          | Ribosomal large subunit      | $7 \times 10^{-8}$  |
|            |                |         |              | Ribosomal small subunit      | $1 \times 10^{-8}$  |
| 3          | SPT2,GCR2,AZF1 | 7       | 0.95         | Ribosomal large subunit      | $1 \times 10^{-12}$ |
| 5          | PDR1           | 7       | 0.81         | Ribosomal large subunit      | $9 \times 10^{-7}$  |
|            |                |         |              | Ribosomal small subunit      | $2 \times 10^{-5}$  |
| 6          | HIR1,HIR2      | 7       | 0.71         | Nucleosomal protein complex  | $7 \times 10^{-12}$ |
| 10         | SWI4           | 6       | 0.73         | Nucleosomal protein complex  | $2 \times 10^{-5}$  |
| 12         | AZF1           | 8       | 0.75         | Ribosomal large subunit      | 0                   |
| 14         | ABF1           | 5       | 1            | Mit. ribosomal large subunit | $2 \times 10^{-11}$ |
| 22         | MET31          | 4       | 1            | Ribosomal large subunit      | $8 \times 10^{-6}$  |
| 26         | ZAP1           | 4       | 1            | Ribosomal large subunit      | $8 \times 10^{-6}$  |
| 29         | SFP1           | 4       | 1            | Ribosomal small subunit      | $6 \times 10^{-9}$  |
| 65         | PHO2           | 3       | 1            | SAGA complex                 | $1 \times 10^{-8}$  |
| 124        | RAP1,FHL1      | 3       | 1            | Ribosomal large subunit      | $2 \times 10^{-6}$  |

TABLE S2 Transcriptionally coregulated interacting protein clusters with the topology of a regulonic complex, defined as a protein subnetwork with at least 3 nodes, at least 70% of all possible pairwise interactions present, and a hypergeometric overlap P-value with a protein complex smaller than  $10^{-4}$ .

III. FUNCTIONAL ANNOTATION OF ABF1 USING COREGULATED PPI SUBNETWORKS

| Cluster ID | MIPS functional category                     | P-value             |
|------------|----------------------------------------------|---------------------|
| 11         | tRNA synthesis                               | $2 \times 10^{-10}$ |
|            | rRNA synthesis                               | $2 \times 10^{-9}$  |
|            | rRNA processing                              | $8 \times 10^{-8}$  |
|            | DNA binding                                  | $3 \times 10^{-5}$  |
|            | RNA binding                                  | $7 \times 10^{-5}$  |
| 14         | Mitochondrion                                | $1 \times 10^{-8}$  |
|            | Ribosomal proteins                           | $9 \times 10^{-8}$  |
| 15         | RNA degradation                              | $3 \times 10^{-6}$  |
|            | Splicing                                     | $5 \times 10^{-6}$  |
| 21         | Cytoskeleton-dependent transport             | $7 \times 10^{-5}$  |
| 25         | Nuclear transport                            | $7 \times 10^{-7}$  |
|            | RNA transport                                | $3 \times 10^{-5}$  |
| 31         | Vesicle fusion                               | $5 \times 10^{-6}$  |
|            | ER to Golgi transport                        | $4 \times 10^{-5}$  |
| 71         | DNA binding                                  | $5 \times 10^{-4}$  |
| 90         | Protein folding and stabilization            | $3 \times 10^{-5}$  |
|            | Protein targeting, sorting and translocation | $8 \times 10^{-4}$  |
| 91         | rRNA processing                              | $7 \times 10^{-6}$  |
| 105        | rRNA processing                              | $1 \times 10^{-4}$  |

TABLE S3 Functional categories enriched with  $P$ -value  $< 10^{-3}$  in transcriptionally coregulated interacting protein clusters regulated by ABF1. Only categories with at least three proteins in the cluster annotated to it are included.

IV. FUNCTIONAL CATEGORIES ENRICHED IN POSTTRANSLATIONAL FEEDFORWARD LOOP CLUSTERS  
CONTROLLED BY CDC28 OR PHO85

| MIPS functional category                          | Enriched clusters           |
|---------------------------------------------------|-----------------------------|
| Metabolism of glutamate                           | 1                           |
| Phosphate metabolism                              | 7, 9, 12, 22                |
| DNA synthesis and replication                     | 14                          |
| G1/S transition of mitotic cell cycle             | 7                           |
| G2/M transition of mitotic cell cycle             | 9, 38                       |
| M phase                                           | 9                           |
| Meiosis                                           | 12                          |
| Transcriptional control                           | 16                          |
| Modification by (de-)(auto-)phosphorylation       | 7, 8, 9, 12, 16, 22, 38, 40 |
| Cyclic nucleotide binding (cAMP, cGMP, etc.)      | 16                          |
| Enzymatic activity regulation / enzyme regulator  | 33                          |
| Nutrient starvation response                      | 8                           |
| Transposable elements, viral and plasmid proteins | 3                           |
| Cell growth / morphogenesis                       | 25, 38                      |
| Cytoskeleton/structural proteins                  | 25                          |
| Budding, cell polarity and filament formation     | 5, 7, 25, 38                |

TABLE S4 MIPS functional categories enriched with hypergeometric  $P < 10^{-3}$  in clusters containing at least four posttranslational regulatory feedforward loop instances, with at least three proteins annotated to the enriched category, and controlled by CDC28 or PHO85.

| MIPS functional category                           | Enriched clusters |
|----------------------------------------------------|-------------------|
| Phosphate metabolism                               | 3, 10             |
| Regulation of phosphate metabolism                 | 4, 7              |
| DNA synthesis and replication                      | 1                 |
| Mitotic cell cycle                                 | 1                 |
| G1 phase of mitotic cell cycle                     | 12                |
| G1/S transition of mitotic cell cycle              | 1, 27             |
| G2/M transition of mitotic cell cycle              | 1, 8, 13, 14, 23  |
| General transcription activities                   | 1                 |
| Transcriptional control                            | 4                 |
| Transcription activation                           | 1                 |
| Modification by (de-)(auto-)phosphorylation        | 3, 4, 10, 15      |
| Enzymatic activity regulation / enzyme regulator   | 1                 |
| Ca2+ mediated signal transduction                  | 3                 |
| Nutrient starvation response                       | 4                 |
| Perception of nutrients and nutritional adaptation | 15                |
| Cell growth / morphogenesis                        | 1                 |
| Cytoskeleton/structural proteins                   | 1                 |
| Budding, cell polarity and filament formation      | 1, 13             |

TABLE S5 MIPS functional categories enriched with hypergeometric  $P < 10^{-3}$  in clusters containing at least four mixed posttranslational-transcriptional regulatory feedforward loop instances, with at least three proteins annotated to the enriched category, and controlled by CDC28 or PHO85.

# V. TRANSCRIPTIONAL AND POSTTRANSLATIONAL PROTEIN-INTERACTION MEDIATED REGULONIC STARS

| Cluster ID | Regulator | Hub   | # Spokes | MIPS functional category      | P-value            |
|------------|-----------|-------|----------|-------------------------------|--------------------|
| 5          | ABF1      | SMT3  | 17       | DNA binding                   | $8 \times 10^{-5}$ |
| 9          | RAP1      | SMT3  | 11       |                               |                    |
| 11         | ABF1      | PSE1  | 10       | Nuclear transport             | $3 \times 10^{-7}$ |
| 14         | HAP1      | HSP82 | 9        |                               |                    |
| 16         | ABF1      | GLC7  | 8        |                               |                    |
| 21         | FHL1      | HMO1  | 6        |                               |                    |
| 28         | SPT2      | CKA1  | 5        | DNA binding                   | $5 \times 10^{-4}$ |
| 29         | RAP1      | TAF1  | 5        | DNA conformation modification | $2 \times 10^{-5}$ |
| 32         | MBP1      | RAD53 | 5        | Cell cycle checkpoints        | $4 \times 10^{-5}$ |
| 36         | FKH1      | NOP1  | 5        | rRNA processing               | $6 \times 10^{-4}$ |
| 44         | ABF1      | CKA1  | 4        |                               |                    |

TABLE S6 Transcriptional protein-interaction mediated regulatory loop clusters with the topology of a regulonic star. # **Spokes** is the number of spoke proteins interacting with the **Regulator** and **Hub** protein. **MIPS functional category** is the most enriched functional category, only shown if it has **P-value** <  $10^{-3}$  and at least three proteins in the cluster annotated to it.

| Cluster ID | Regulator | Hub   | # Spokes | MIPS functional category                      | P-value            |
|------------|-----------|-------|----------|-----------------------------------------------|--------------------|
| 10         | YCK1      | HSP82 | 19       |                                               |                    |
| 38         | HMT1      | NPL3  | 8        | RNA binding                                   | $2 \times 10^{-9}$ |
| 43         | CLB2      | NAP1  | 7        | Budding, cell polarity and filament formation | $6 \times 10^{-4}$ |
| 61         | SNF1      | SMT3  | 6        |                                               |                    |
| 62         | CLB2      | KEL1  | 8        | Budding, cell polarity and filament formation | $3 \times 10^{-4}$ |
| 63         | PHO85     | CLB2  | 6        |                                               |                    |
| 64         | PHO85     | YKU80 | 8        | Regulation of phosphate metabolism            | $2 \times 10^{-6}$ |
| 66         | YPL141C   | HSP82 | 6        |                                               |                    |
| 67         | KSP1      | SRS2  | 6        |                                               |                    |
| 77         | IPL1      | YRA1  | 5        |                                               |                    |
| 99         | CMK1      | CMD1  | 5        |                                               |                    |
| 103        | CDC28     | RPO21 | 4        |                                               |                    |
| 118        | SNF1      | GLC7  | 4        |                                               |                    |
| 119        | PHO85     | YHB1  | 4        |                                               |                    |
| 120        | ATG1      | ATG17 | 4        |                                               |                    |
| 121        | MEC1      | RAD53 | 4        | Cell cycle checkpoints                        | $2 \times 10^{-7}$ |
| 122        | PCL1      | PHO4  | 4        |                                               |                    |

TABLE S7 Posttranslational protein-interaction mediated regulatory loop clusters with the topology of a regulonic star. # **Spokes** is the number of spoke proteins interacting with the **Regulator** and **Hub** protein. **MIPS functional category** is the most enriched functional category, only shown if it has **P-value** <  $10^{-3}$  and at least three proteins in the cluster annotated to it.

# VI. PROTEIN COMPLEXES FORMING PROTEIN-INTERACTION MEDIATED TRANSCRIPTIONAL REGULATORY INTERACTING DOUBLE-STARs

| Cluster ID | Regulator  | Hub        | # Spokes | Protein complex name        | P-value             |
|------------|------------|------------|----------|-----------------------------|---------------------|
| 1          | YAP1       | SRB6, SRB7 | 25       | Srb10p complex              | $2 \times 10^{-7}$  |
| 1          | YAP1       | SRB6, SRB7 | 25       | SAGA complex                | $4 \times 10^{-7}$  |
| 1          | YAP1       | SRB6, SRB7 | 25       | SAGA-like complex           | $6 \times 10^{-7}$  |
| 1          | YAP1       | SRB6, SRB7 | 25       | SRB Mediator complex        | $1 \times 10^{-12}$ |
| 4          | PHO4       | RPS1B      | 18       | Ribosomal large subunit     | $4 \times 10^{-12}$ |
| 4          | PHO4       | RPS1B      | 18       | Ribosomal small subunit     | $5 \times 10^{-7}$  |
| 15         | REB1       | STH1       | 8        | RSC complex                 | $8 \times 10^{-5}$  |
| 17         | ADR1       | TAF3, MED1 | 7        | ADA complex                 | $3 \times 10^{-5}$  |
| 17         | ADR1       | TAF3, MED1 | 7        | SAGA complex                | $2 \times 10^{-11}$ |
| 17         | ADR1       | TAF3, MED1 | 7        | SAGA-like complex           | $2 \times 10^{-5}$  |
| 17         | ADR1       | TAF3, MED1 | 7        | TAFIIs                      | $1 \times 10^{-12}$ |
| 19         | YAP1       | SSN8       | 7        | Srb10p complex              | $8 \times 10^{-12}$ |
| 19         | YAP1       | SSN8       | 7        | SRB Mediator complex        | $6 \times 10^{-9}$  |
| 20         | HAP4, KSS1 | GCN4       | 5        | SWI/SNF complex             | $4 \times 10^{-12}$ |
| 23         | SNF1       | SRB6, NUT2 | 5        | Srb10p complex              | $6 \times 10^{-6}$  |
| 23         | SNF1       | SRB6, NUT2 | 5        | SRB Mediator complex        | $1 \times 10^{-6}$  |
| 33         | FKH1, FKH2 | HHF1, FKH1 | 5        | Nucleosomal protein complex | $3 \times 10^{-6}$  |
| 47         | HIR1       | MAM33      | 3        | Nucleosomal protein complex | $8 \times 10^{-6}$  |
| 49         | KSS1       | GCN4       | 3        | 19/22S regulator            | $5 \times 10^{-5}$  |

TABLE S8 Protein-interaction mediated transcriptional regulatory loop clusters with the topology of a regulatory interacting double-star. All clusters with one or two regulators and hub proteins and at least 3 spoke proteins are shown if they have a hypergeometric overlap *P*-value with a protein complex smaller than  $10^{-4}$ .

# VII. PROTEIN COMPLEXES FORMING PROTEIN-INTERACTION MEDIATED POSTTRANSLATIONAL REGULATORY INTERACTING DOUBLE-STARs

| Cluster ID | Regulator  | Hub        | # Spokes | Protein complex name                        | P-value             |
|------------|------------|------------|----------|---------------------------------------------|---------------------|
| 7          | HRR25      | ENP1,RPS3  | 18       | Ribosomal small subunit                     | $5 \times 10^{-12}$ |
| 9          | PRP43      | SPP382     | 21       | mRNA splicing                               | $1 \times 10^{-7}$  |
| 9          | PRP43      | SPP382     | 21       | Prp19p-associated complex                   | $3 \times 10^{-5}$  |
| 13         | FIP1       | PAP1       | 16       | pre mRNA3'-end processing factor CFII       | $4 \times 10^{-11}$ |
| 13         | FIP1       | PAP1       | 16       | pre mRNA polyadenylation factor PFI         | $2 \times 10^{-5}$  |
| 14         | KIN28,MED6 | RPO21      | 14       | RNA polymerase II                           | $3 \times 10^{-6}$  |
| 14         | KIN28,MED6 | RPO21      | 14       | SRB Mediator complex                        | 0                   |
| 17         | CKB2       | HHF1,HHF2  | 11       | Casein kinase II                            | $2 \times 10^{-5}$  |
| 18         | SLA1       | LAS17      | 14       | Actin-associated proteins                   | $2 \times 10^{-9}$  |
| 24         | PAB1       | CRM1       | 12       | Nuclear pore complex (NPC)                  | $8 \times 10^{-9}$  |
| 24         | PAB1       | CRM1       | 12       | NSP1 complex                                | $2 \times 10^{-5}$  |
| 27         | SIN3       | HHT1,HHT2  | 10       | Casein kinase II                            | $2 \times 10^{-8}$  |
| 27         | SIN3       | HHT1,HHT2  | 10       | Nucleosomal protein complex                 | $5 \times 10^{-10}$ |
| 31         | EPL1       | HHF1,HHF2  | 7        | Nucleosomal protein complex                 | $5 \times 10^{-8}$  |
| 32         | SSN3       | MED2       | 9        | SRB Mediator complex                        | $6 \times 10^{-11}$ |
| 39         | CDC28      | SPC110     | 5        | SPB components                              | $1 \times 10^{-7}$  |
| 42         | SMT3       | CBF2       | 8        | CBF3 protein complex                        | $1 \times 10^{-5}$  |
| 47         | COF1       | ACT1       | 7        | Actin-associated proteins                   | $3 \times 10^{-11}$ |
| 50         | FUS3,STE11 | STE7       | 7        | STE5-MAPK complex                           | $6 \times 10^{-12}$ |
| 51         | SIR2       | HHF1       | 6        | Nucleosomal protein complex                 | $3 \times 10^{-5}$  |
| 51         | SIR2       | HHF1       | 6        | RNA polymerase I                            | $1 \times 10^{-4}$  |
| 52         | RPO21      | KIN28      | 7        | TFIIH                                       | $5 \times 10^{-5}$  |
| 53         | SNF1       | GCN5       | 6        | Serine/threonine phosphoprotein phosphatase | $2 \times 10^{-8}$  |
| 54         | GCN5       | HHT1,HTA1  | 5        | Nucleosomal protein complex                 | $3 \times 10^{-5}$  |
| 54         | GCN5       | HHT1,HTA1  | 5        | SAGA-like complex (SLIK)                    | $1 \times 10^{-5}$  |
| 56         | PRK1,ARK1  | SLA1,PAN1  | 3        | Actin-associated proteins                   | $1 \times 10^{-11}$ |
| 57         | CTK1       | HTZ1       | 7        | Nucleosomal protein complex                 | $6 \times 10^{-12}$ |
| 60         | SSN3       | GCN4       | 6        | SRB Mediator complex                        | $2 \times 10^{-12}$ |
| 71         | GLC7       | PTA1       | 6        | cytoplasmic ribosomal large subunit         | $6 \times 10^{-9}$  |
| 80         | CDC34,SIC1 | CLN2       | 7        | Cdc28p complexes                            | $6 \times 10^{-5}$  |
| 80         | CDC34,SIC1 | CLN2       | 7        | SCF-CDC4 complex                            | $1 \times 10^{-8}$  |
| 80         | CDC34,SIC1 | CLN2       | 7        | SCF-GRR1 complex                            | $5 \times 10^{-9}$  |
| 80         | CDC34,SIC1 | CLN2       | 7        | SCF-MET30 complex                           | $8 \times 10^{-6}$  |
| 87         | SSN8       | GAL4       | 5        | Srb10p complex                              | $5 \times 10^{-6}$  |
| 88         | RNA1       | GSP1       | 5        | Nuclear pore complex (NPC)                  | $6 \times 10^{-5}$  |
| 89         | KIN28      | RGR1,MED4  | 4        | RNA polymerase II                           | $4 \times 10^{-5}$  |
| 89         | KIN28      | RGR1,MED4  | 4        | SRB Mediator complex                        | $3 \times 10^{-7}$  |
| 92         | GIN4       | SHS1       | 5        | Septin filaments                            | $4 \times 10^{-12}$ |
| 94         | CDC9       | RAD24      | 5        | Replication factor C complex                | $2 \times 10^{-11}$ |
| 97         | BBC1       | LAS17      | 5        | Actin-associated proteins                   | $1 \times 10^{-6}$  |
| 97         | BBC1       | LAS17      | 5        | Actin-associated motorproteins              | $2 \times 10^{-5}$  |
| 98         | PHO81      | PHO85      | 5        | Pho85p complexes                            | $1 \times 10^{-5}$  |
| 100        | RTT109     | HHT1,HHT2  | 4        | Nucleosomal protein complex                 | $8 \times 10^{-6}$  |
| 101        | CDC28      | RPN10      | 4        | 19/22S regulator                            | $2 \times 10^{-10}$ |
| 102        | CDC5       | MCD1,REC8  | 3        | Sister chromatid cohesion complex           | $2 \times 10^{-11}$ |
| 113        | FUS3       | STE5,HSC82 | 5        | STE5-MAPK complex                           | $8 \times 10^{-9}$  |
| 115        | GLO3       | ARF1       | 4        | COPI                                        | $1 \times 10^{-11}$ |
| 116        | CKA1       | MIG1       | 4        | Nucleosomal protein complex                 | $1 \times 10^{-8}$  |
| 117        | RPO21      | SSL1       | 4        | TFIIH                                       | $2 \times 10^{-8}$  |
| 117        | RPO21      | SSL1       | 4        | NEF3 complex                                | $2 \times 10^{-5}$  |
| 132        | CDC7       | MCM2,DBF4  | 4        | Post-replication ORC complex                | $8 \times 10^{-6}$  |
| 132        | CDC7       | MCM2,DBF4  | 4        | Replication initiation complex              | $1 \times 10^{-8}$  |
| 132        | CDC7       | MCM2,DBF4  | 4        | Pre-replication complex (pre-RC)            | $1 \times 10^{-7}$  |
| 132        | CDC7       | MCM2,DBF4  | 4        | Replication complex                         | $3 \times 10^{-7}$  |
| 133        | GLC7,PRK1  | PAN1       | 4        | Actin-associated proteins                   | $5 \times 10^{-7}$  |

TABLE S9 Protein-interaction mediated posttranslational regulatory loop clusters with the topology of a regulatory interacting double-star. All clusters with one or two regulators and hub proteins and at least 4 spoke proteins are shown if they have a hypergeometric overlap *P*-value with a protein complex smaller than  $10^{-4}$ .

VIII. KEY TO CLUSTERING ALGORITHM OUTPUT FILES

We supply as separate text files the output of the motif clustering algorithm for each of the 10 significantly aggregating network motifs. These files list for each cluster the motif instances assigned to it, and have the format

ClusterID      GeneX      GeneY      GeneZ

The order of interactions can be deduced from the file name: T = transcriptional, B = biochemical (posttranslational) and P = protein-protein interaction. In the file names below, the first letter refers to the interaction between GeneX and GeneY, the second between GeneY and GeneZ and the third between GeneZ and GeneX; 'i' refers to 'inverse', i.e. 'Ti' between Z and X means a transcriptional interaction from X to Z. For symmetric motifs (e.g. TBTi), each motif instance is listed twice, once with the PPI in each direction, since this is how the algorithm stores such motifs internally.

The result files together with the source code of the algorithm are available at

<http://omics.frias.uni-freiburg.de/motifclust>

| Network motif                                                       | File name         |
|---------------------------------------------------------------------|-------------------|
| Transcriptional feedforward loop                                    | TTTi_clusters.txt |
| Transcriptionally coregulated interacting proteins                  | TPTi_clusters.txt |
| Copointing interacting transcriptional regulators                   | TiPT_clusters.txt |
| Copointing interacting posttranslational regulators                 | BiPB_clusters.txt |
| Protein-interaction mediated transcriptional regulatory loop        | TPP_clusters.txt  |
| Protein-interaction mediated posttranslational regulatory loop      | BPP_clusters.txt  |
| Posttranslational feedforward loop                                  | BBBi_clusters.txt |
| Mixed posttranslational-transcriptional feedforward loop            | BTBi_clusters     |
| Mixed posttranslational-transcriptional feedforward loop with PPI 1 | PTBi_clusters.txt |
| Mixed posttranslational-transcriptional feedforward loop with PPI 2 | TPB_clusters.txt  |

TABLE S10 Key to clustering algorithm output files for all significantly aggregating network motifs.
